# Supplementary material for: Venous Thromboembolism in Denmark: Seasonality in Occurrence and Mortality
Source: PubMed Central journal article supplement (PMC6598086; doi:10.1055/s-0039-1692399), 2019-06-18
Supplement: 10-1055-s-0039-1692399-s190019.pdf [file 10-1055-s-0039-1692399-s190019.pdf]

## Supplementary Material

**Table S1** *International Classification of Diseases (ICD) codes used in the study*

|                                         | ICD-8            | ICD-10             | Other codes in the Danish National Patient Registry                                                       |
|-----------------------------------------|------------------|--------------------|-----------------------------------------------------------------------------------------------------------|
| Deep venous thrombosis                  | 45100            | I801-3             |                                                                                                           |
| Pulmonary embolism                      | 45099            | I26                |                                                                                                           |
| Splanchnic venous thrombosis            |                  |                    |                                                                                                           |
| Portal venous thrombosis                | 45299            | I81.9              |                                                                                                           |
| Mesenteric venous thrombosis            | 44429            | K55.0H             |                                                                                                           |
| Splenic venous thrombosis               | 28944, 45303     | NA                 |                                                                                                           |
| Hepatic venous thrombosis               | 45301            | I82.0              |                                                                                                           |
| Cerebral venous thrombosis              | NA               | DI636, DI676       |                                                                                                           |
| Retinal venous thrombosis               | 37708            | DH348              |                                                                                                           |
| Classic provoking factors               |                  |                    |                                                                                                           |
| Cancer, any previous diagnosis          | 140-209, 28710   | C00-C99, D45, D473 |                                                                                                           |
| Fracture/trauma within previous 90 days | 800-929, 950-959 | S00-T14            |                                                                                                           |
| Surgery within previous 90 days         |                  |                    | Previous Danish Classification up to 1996: 000000-99960; NOMESCO classification after 1996: KA-KQ, KX, KY |
| Pregnancy within previous 90 days       | 630-680          | O00-O99            |                                                                                                           |

**Table S2** *International Classification of Diseases (ICD) codes used for diseases included in the Charlson Comorbidity Index*

|    | Disease                                            | ICD-8                                                    | ICD-10                                                                   | Score |
|----|----------------------------------------------------|----------------------------------------------------------|--------------------------------------------------------------------------|-------|
| 1  | Myocardial infarction                              | 410                                                      | I21; I22; I23                                                            | 1     |
| 2  | Congestive heart failure                           | 42709; 42710; 42711; 42719; 42899; 78249                 | I50; I11.0; I13.0; I13.2                                                 | 1     |
| 3  | Peripheral vascular disease                        | 440; 441; 442; 443; 444; 445                             | I70; I71; I72; I73; I74; I77                                             | 1     |
| 4  | Cerebrovascular disease                            | 430-438                                                  | I60-I69; G45; G46                                                        | 1     |
| 5  | Dementia                                           | 29009-29019; 29309                                       | F00-F03; F05.1; G30                                                      | 1     |
| 6  | Chronic pulmonary disease                          | 490-493; 515-518                                         | J40-J47; J60-J67; J68.4; J70.1; J70.3; J84.1; J92.0; J96.1; J98.2; J98.3 | 1     |
| 7  | Connective tissue disease                          | 712; 716; 734; 446; 13599                                | M05; M06; M08; M09; M30; M31; M32; M33; M34; M35; M36; D86               | 1     |
| 8  | Ulcer disease                                      | 53091; 53098; 531-534                                    | K22.1; K25-K28                                                           | 1     |
| 9  | Mild liver disease                                 | 571; 57301; 57304                                        | B18; K70.0-K70.3; K70.9; K71; K73; K74; K76.0                            | 1     |
| 10 | Diabetes type 1<br>Diabetes type 2                 | 24900; 24906; 24907; 24909<br>25000; 25006; 25007; 25009 | E10.0, E10.1; E10.9<br>E11.0; E11.1; E11.9                               | 1     |
| 11 | Hemiplegia                                         | 344                                                      | G81; G82                                                                 | 2     |
| 12 | Moderate to severe renal disease                   | 403; 404; 580-583; 584; 59009; 59319; 75310-75319; 792   | I12; I13; N00-N05; N07; N11; N14; N17-N19; Q61                           | 2     |
| 13 | Diabetes with end organ damage<br>Type 1<br>Type 2 | 24901-24905; 24908<br>25001-25005; 25008                 | E10.2-E10.8<br>E11.2-E11.8                                               | 2     |
| 14 | Any tumor                                          | 140-194                                                  | C00-C75                                                                  | 2     |
| 15 | Leukemia                                           | 204-207                                                  | C91-C95                                                                  | 2     |
| 16 | Lymphoma                                           | 200-203; 27559                                           | C81-C85; C88; C90; C96                                                   | 2     |

**Table S2** (Continued)

|    | Disease                          | ICD-8                                                 | ICD-10                                             | Score |
|----|----------------------------------|-------------------------------------------------------|----------------------------------------------------|-------|
| 17 | Moderate to severe liver disease | 07000; 07002; 07004; 07006; 07008; 57300; 45600-45609 | B15.0; B16.0; B16.2; B19.0; K70.4; K72; K76.6; I85 | 3     |
| 18 | Metastatic solid tumor           | 195-198; 199                                          | C76-C80                                            | 6     |
| 19 | AIDS                             | 07983                                                 | B21-B24                                            | 6     |

**Table S3** Number (%) of cases of deep venous thrombosis, pulmonary embolism, provoked VTE, unprovoked VTE, splanchnic venous thrombosis (1977–2016), cerebral venous thrombosis, and retinal venous thrombosis (1994–2016), by year of diagnosis

|                   | Deep venous thrombosis | Pulmonary embolism | Provoked VTE | Unprovoked VTE | Splanchnic venous thrombosis | Cerebral venous thrombosis | Retinal venous thrombosis |
|-------------------|------------------------|--------------------|--------------|----------------|------------------------------|----------------------------|---------------------------|
| Year of diagnosis |                        |                    |              |                |                              |                            |                           |
| 1977              | 1,757 (1.7)            | 2,389 (2.8)        | 1,470 (2.1)  | 2,676 (2.3)    | 105 (2.6)                    | NA                         | NA                        |
| 1978              | 1,769 (1.7)            | 2,501 (3.0)        | 1,642 (2.3)  | 2,628 (2.3)    | 84 (2.1)                     | NA                         | NA                        |
| 1979              | 1,748 (1.7)            | 2,456 (2.9)        | 1,738 (2.5)  | 2,466 (2.1)    | 91 (2.3)                     | NA                         | NA                        |
| 1980              | 1,710 (1.7)            | 2,199 (2.6)        | 1,541 (2.2)  | 2,368 (2.0)    | 89 (2.2)                     | NA                         | NA                        |
| 1981              | 1,871 (1.8)            | 2,196 (2.6)        | 1,602 (2.3)  | 2,465 (2.1)    | 84 (2.1)                     | NA                         | NA                        |
| 1982              | 1,871 (1.8)            | 2,178 (2.6)        | 1,711 (2.4)  | 2,338 (2.0)    | 71 (1.8)                     | NA                         | NA                        |
| 1983              | 1,897 (1.9)            | 2,172 (2.6)        | 1,667 (2.4)  | 2,402 (2.1)    | 76 (1.9)                     | NA                         | NA                        |
| 1984              | 1,907 (1.9)            | 2,064 (2.5)        | 1,731 (2.5)  | 2,240 (1.9)    | 79 (2.0)                     | NA                         | NA                        |
| 1985              | 1,895 (1.9)            | 1,980 (2.4)        | 1,622 (2.3)  | 2,253 (1.9)    | 90 (2.3)                     | NA                         | NA                        |
| 1986              | 1,816 (1.8)            | 1,769 (2.1)        | 1,486 (2.1)  | 2,099 (1.8)    | 97 (2.4)                     | NA                         | NA                        |
| 1987              | 1,638 (1.6)            | 1,631 (1.9)        | 1,357 (1.9)  | 1,912 (1.6)    | 87 (2.2)                     | NA                         | NA                        |
| 1988              | 1,640 (1.6)            | 1,562 (1.9)        | 1,339 (1.9)  | 1,863 (1.6)    | 54 (1.4)                     | NA                         | NA                        |
| 1989              | 1,510 (1.5)            | 1,437 (1.7)        | 1,215 (1.7)  | 1,732 (1.5)    | 81 (2.0)                     | NA                         | NA                        |
| 1990              | 1,546 (1.5)            | 1,234 (1.5)        | 1,115 (1.6)  | 1,665 (1.4)    | 91 (2.3)                     | NA                         | NA                        |
| 1991              | 1,446 (1.4)            | 1,208 (1.4)        | 1,058 (1.5)  | 1,596 (1.4)    | 71 (1.8)                     | NA                         | NA                        |
| 1992              | 1,522 (1.5)            | 1,153 (1.4)        | 1,013 (1.4)  | 1,662 (1.4)    | 58 (1.5)                     | NA                         | NA                        |
| 1993              | 1,560 (1.5)            | 1,155 (1.4)        | 1,040 (1.5)  | 1,675 (1.4)    | 66 (1.7)                     | NA                         | NA                        |
| 1994              | 2,326 (2.3)            | 1,303 (1.5)        | 1,353 (1.9)  | 2,276 (2.0)    | 52 (1.3)                     | 27 (2.4)                   | 472 (3.0)                 |
| 1995              | 2,278 (2.2)            | 1,378 (1.6)        | 1,338 (1.9)  | 2,318 (2.0)    | 36 (0.9)                     | 31 (2.8)                   | 507 (3.2)                 |
| 1996              | 2,324 (2.3)            | 1,310 (1.6)        | 1,123 (1.6)  | 2,511 (2.2)    | 46 (1.2)                     | 22 (2.0)                   | 499 (3.2)                 |
| 1997              | 2,508 (2.5)            | 1,346 (1.6)        | 1,127 (1.6)  | 2,727 (2.3)    | 47 (1.2)                     | 33 (3.0)                   | 512 (3.3)                 |
| 1998              | 2,456 (2.4)            | 1,408 (1.7)        | 1,185 (1.7)  | 2,679 (2.3)    | 43 (1.1)                     | 31 (2.8)                   | 479 (3.0)                 |
| 1999              | 2,588 (2.5)            | 1,499 (1.8)        | 1,250 (1.8)  | 2,837 (2.4)    | 47 (1.2)                     | 34 (3.0)                   | 488 (3.1)                 |
| 2000              | 2,671 (2.6)            | 1,517 (1.8)        | 1,303 (1.9)  | 2,885 (2.5)    | 51 (1.3)                     | 29 (2.6)                   | 524 (3.3)                 |
| 2001              | 2,732 (2.7)            | 1,598 (1.9)        | 1,360 (1.9)  | 2,970 (2.6)    | 61 (1.5)                     | 20 (1.8)                   | 597 (3.8)                 |
| 2002              | 3,047 (3.0)            | 1,738 (2.1)        | 1,525 (2.2)  | 3,260 (2.8)    | 74 (1.9)                     | 39 (3.5)                   | 544 (3.5)                 |
| 2003              | 3,086 (3.0)            | 1,772 (2.1)        | 1,679 (2.4)  | 3,179 (2.7)    | 85 (2.1)                     | 34 (3.0)                   | 533 (3.4)                 |
| 2004              | 3,240 (3.2)            | 1,919 (2.3)        | 1,759 (2.5)  | 3,400 (2.9)    | 89 (2.2)                     | 62 (5.5)                   | 643 (4.1)                 |
| 2005              | 3,442 (3.4)            | 1,897 (2.3)        | 1,798 (2.6)  | 3,541 (3.1)    | 83 (2.1)                     | 45 (4.0)                   | 598 (3.8)                 |
| 2006              | 3,697 (3.6)            | 2,130 (2.5)        | 2,039 (2.9)  | 3,788 (3.3)    | 99 (2.5)                     | 59 (5.3)                   | 583 (3.7)                 |
| 2007              | 3,815 (3.7)            | 2,275 (2.7)        | 2,141 (3.1)  | 3,949 (3.4)    | 123 (3.1)                    | 52 (4.7)                   | 570 (3.6)                 |
| 2008              | 3,515 (3.4)            | 2,310 (2.7)        | 2,090 (3.0)  | 3,735 (3.2)    | 126 (3.2)                    | 63 (5.6)                   | 632 (4.0)                 |

(Continued)

**Table S3** (Continued)

|      | Deep venous thrombosis | Pulmonary embolism | Provoked VTE | Unprovoked VTE | Splanchnic venous thrombosis | Cerebral venous thrombosis | Retinal venous thrombosis |
|------|------------------------|--------------------|--------------|----------------|------------------------------|----------------------------|---------------------------|
| 2009 | 3,713 (3.6)            | 2,543 (3.0)        | 2,407 (3.4)  | 3,849 (3.3)    | 149 (3.8)                    | 53 (4.7)                   | 619 (3.9)                 |
| 2010 | 3,635 (3.6)            | 2,779 (3.3)        | 2,526 (3.6)  | 3,888 (3.3)    | 155 (3.9)                    | 57 (5.1)                   | 659 (4.2)                 |
| 2011 | 3,424 (3.4)            | 2,944 (3.5)        | 2,462 (3.5)  | 3,906 (3.4)    | 160 (4.0)                    | 57 (5.1)                   | 894 (5.7)                 |
| 2012 | 3,794 (3.7)            | 3,347 (4.0)        | 2,860 (4.1)  | 4,281 (3.7)    | 195 (4.9)                    | 55 (4.9)                   | 1,061 (6.8)               |
| 2013 | 3,858 (3.8)            | 3,642 (4.3)        | 2,939 (4.2)  | 4,561 (3.9)    | 210 (5.3)                    | 63 (5.6)                   | 1,050 (6.7)               |
| 2014 | 3,531 (3.5)            | 4,020 (4.8)        | 3,047 (4.4)  | 4,504 (3.9)    | 229 (5.8)                    | 67 (6.0)                   | 1,069 (6.8)               |
| 2015 | 3,482 (3.4)            | 4,136 (4.9)        | 3,149 (4.5)  | 4,469 (3.9)    | 226 (5.7)                    | 95 (8.5)                   | 1,079 (6.9)               |
| 2016 | 3,630 (3.6)            | 3,985 (4.7)        | 3,101 (4.4)  | 4,514 (3.9)    | 212 (5.3)                    | 90 (8.1)                   | 1,094 (7.0)               |

Abbreviations: NA, not applicable; VTE, venous thromboembolism.

**Table S4** Number of cases (%) of deep venous thrombosis, pulmonary embolism, provoked VTE, unprovoked VTE, splanchnic venous thrombosis (1977–2016), cerebral venous thrombosis, and retinal venous thrombosis (1994–2016), by month of diagnosis

|                                 | Deep venous thrombosis | Pulmonary embolism | Provoked VTE | Unprovoked VTE | Splanchnic venous thrombosis | Cerebral venous thrombosis | Retinal venous thrombosis |
|---------------------------------|------------------------|--------------------|--------------|----------------|------------------------------|----------------------------|---------------------------|
| Month of diagnosis <sup>a</sup> |                        |                    |              |                |                              |                            |                           |
| January                         | 9,216 (9.2)            | 7,945 (9.6)        | 6,179 (9.0)  | 10,982 (9.6)   | 310 (7.9)                    | 94 (8.5)                   | 1,342 (8.7)               |
| February                        | 8,732 (8.7)            | 7,658 (9.2)        | 6,177 (9.0)  | 10,213 (8.9)   | 296 (7.6)                    | 79 (7.1)                   | 1,340 (8.7)               |
| March                           | 8,840 (8.8)            | 7,184 (8.7)        | 6,002 (8.7)  | 10,022 (8.8)   | 308 (7.9)                    | 97 (8.8)                   | 1,306 (8.4)               |
| April                           | 8,303 (8.3)            | 6,469 (7.8)        | 5,565 (8.1)  | 9,207 (8.0)    | 321 (8.2)                    | 91 (8.3)                   | 1,160 (7.5)               |
| May                             | 8,168 (8.1)            | 6,295 (7.6)        | 5,366 (7.8)  | 9,097 (7.9)    | 329 (8.4)                    | 70 (6.3)                   | 1,260 (8.1)               |
| June                            | 8,289 (8.3)            | 6,332 (7.6)        | 5,644 (8.2)  | 8,977 (7.8)    | 316 (8.1)                    | 93 (8.4)                   | 1,364 (8.8)               |
| July                            | 7,731 (7.7)            | 6,168 (7.4)        | 5,115 (7.4)  | 8,784 (7.7)    | 295 (7.5)                    | 89 (8.1)                   | 1,117 (7.2)               |
| August                          | 8,220 (8.2)            | 6,580 (7.9)        | 5,337 (7.7)  | 9,463 (8.3)    | 353 (9.0)                    | 81 (7.4)                   | 1,206 (7.8)               |
| September                       | 8,213 (8.2)            | 6,999 (8.4)        | 5,745 (8.3)  | 9,467 (8.3)    | 341 (8.7)                    | 111 (10.1)                 | 1,278 (8.3)               |
| October                         | 8,386 (8.3)            | 6,851 (8.3)        | 5,898 (8.6)  | 9,339 (8.2)    | 341 (8.7)                    | 99 (9.0)                   | 1,394 (9.0)               |
| November                        | 8,411 (8.4)            | 7,490 (9.0)        | 6,155 (8.9)  | 9,746 (8.5)    | 357 (9.1)                    | 125 (11.3)                 | 1,457 (9.4)               |
| December                        | 7,944 (7.9)            | 6,957 (8.4)        | 5,762 (8.4)  | 9,139 (8.0)    | 346 (8.9)                    | 75 (6.8)                   | 1,264 (8.2)               |

Abbreviation: VTE, venous thromboembolism.

<sup>a</sup>Cases were adjusted for the length of the month and rounded to the nearest integer.

**Table S5** Number (%) of deaths within 90 days following a deep venous thrombosis, pulmonary embolism, provoked VTE, unprovoked VTE, splanchnic venous thrombosis (1977–2016), cerebral venous thrombosis, and retinal venous thrombosis (1994–2016), by year of diagnosis

|                   | Deep venous thrombosis | Pulmonary embolism | Provoked VTE | Unprovoked VTE | Splanchnic venous thrombosis | Cerebral venous thrombosis | Retinal venous thrombosis |
|-------------------|------------------------|--------------------|--------------|----------------|------------------------------|----------------------------|---------------------------|
| Year of diagnosis |                        |                    |              |                |                              |                            |                           |
| 1977              | 94 (1.4)               | 1,286 (4.5)        | 570 (3.1)    | 7,718 (4.9)    | 69 (4.1)                     | NA                         | NA                        |
| 1978              | 110 (1.7)              | 1,440 (5.0)        | 697 (3.8)    | 8,350 (5.1)    | 59 (3.5)                     | NA                         | NA                        |
| 1979              | 118 (1.8)              | 1,448 (5.1)        | 756 (4.1)    | 7,849 (4.9)    | 75 (4.4)                     | NA                         | NA                        |
| 1980              | 112 (1.7)              | 1,261 (4.4)        | 656 (3.6)    | 7,675 (4.3)    | 76 (4.5)                     | NA                         | NA                        |
| 1981              | 132 (2.0)              | 1,261 (4.4)        | 666 (3.6)    | 7,902 (4.4)    | 63 (3.7)                     | NA                         | NA                        |
| 1982              | 132 (2.0)              | 1,270 (4.4)        | 694 (3.8)    | 7,674 (4.2)    | 54 (3.2)                     | NA                         | NA                        |
| 1983              | 99 (1.5)               | 1,200 (4.2)        | 689 (3.7)    | 8,051 (3.7)    | 53 (3.1)                     | NA                         | NA                        |
| 1984              | 128 (2.0)              | 1,190 (4.2)        | 699 (3.8)    | 7,472 (3.7)    | 59 (3.5)                     | NA                         | NA                        |
| 1985              | 107 (1.6)              | 1,106 (3.9)        | 633 (3.4)    | 7,461 (3.5)    | 67 (4.0)                     | NA                         | NA                        |
| 1986              | 127 (1.9)              | 985 (3.4)          | 587 (3.2)    | 7,076 (3.1)    | 71 (4.2)                     | NA                         | NA                        |
| 1987              | 115 (1.8)              | 868 (3.0)          | 496 (2.7)    | 6,498 (2.9)    | 64 (3.8)                     | NA                         | NA                        |
| 1988              | 122 (1.9)              | 842 (2.9)          | 486 (2.6)    | 6,295 (2.9)    | 33 (1.9)                     | NA                         | NA                        |
| 1989              | 95 (1.4)               | 767 (2.7)          | 461 (2.5)    | 5,923 (2.4)    | 46 (2.7)                     | NA                         | NA                        |
| 1990              | 110 (1.7)              | 629 (2.2)          | 381 (2.1)    | 5,710 (2.1)    | 71 (4.2)                     | NA                         | NA                        |
| 1991              | 101 (1.5)              | 526 (1.8)          | 342 (1.9)    | 5,663 (1.7)    | 49 (2.9)                     | NA                         | NA                        |
| 1992              | 91 (1.4)               | 503 (1.8)          | 302 (1.6)    | 5,800 (1.7)    | 33 (1.9)                     | NA                         | NA                        |
| 1993              | 102 (1.6)              | 459 (1.6)          | 273 (1.5)    | 5,847 (1.7)    | 39 (2.3)                     | NA                         | NA                        |
| 1994              | 133 (2.0)              | 545 (1.9)          | 346 (1.9)    | 8,068 (2.0)    | 21 (1.2)                     | 5 (6.7)                    | 5 (4.1)                   |
| 1995              | 140 (2.1)              | 508 (1.8)          | 338 (1.8)    | 8,277 (1.9)    | <5                           | <5                         | 9 (7.3)                   |
| 1996              | 138 (2.1)              | 426 (1.5)          | 246 (1.3)    | 9,226 (1.9)    | 13 (0.8)                     | <5                         | <5                        |
| 1997              | 168 (2.6)              | 421 (1.5)          | 249 (1.4)    | 9,807 (2.0)    | 13 (0.8)                     | 5 (6.7)                    | <5                        |
| 1998              | 128 (2.0)              | 407 (1.4)          | 240 (1.3)    | 9,992 (1.8)    | 8 (0.5)                      | <5                         | <5                        |
| 1999              | 182 (2.8)              | 410 (1.4)          | 264 (1.4)    | 10,491 (2.0)   | 20 (1.2)                     | <5                         | 5 (4.1)                   |
| 2000              | 186 (2.8)              | 403 (1.4)          | 279 (1.5)    | 10,611 (1.0)   | 17 (1.0)                     | <5                         | <5                        |
| 2001              | 191 (2.9)              | 390 (1.4)          | 297 (1.6)    | 11,061 (1.7)   | 21 (1.2)                     | <5                         | 5 (4.1)                   |
| 2002              | 215 (3.3)              | 422 (1.5)          | 309 (1.7)    | 12,013 (2.0)   | 23 (1.4)                     | <5                         | 7 (5.7)                   |
| 2003              | 218 (3.3)              | 441 (1.5)          | 344 (1.9)    | 11,964 (1.9)   | 28 (1.7)                     | <5                         | <5                        |
| 2004              | 243 (3.7)              | 426 (1.5)          | 337 (1.8)    | 12,582 (2.0)   | 31 (1.8)                     | 8 (10.7)                   | 9 (7.3)                   |
| 2005              | 254 (3.9)              | 411 (1.4)          | 349 (1.9)    | 13,261 (1.9)   | 27 (1.6)                     | <5                         | <5                        |
| 2006              | 253 (3.9)              | 449 (1.6)          | 400 (2.2)    | 14,248 (1.8)   | 30 (1.8)                     | <5                         | 6 (4.9)                   |
| 2007              | 246 (3.8)              | 492 (1.7)          | 412 (2.2)    | 14,984 (2.0)   | 43 (2.5)                     | <5                         | <5                        |
| 2008              | 265 (4.0)              | 494 (1.7)          | 456 (2.5)    | 14,262 (1.8)   | 30 (1.8)                     | <5                         | 9 (7.3)                   |
| 2009              | 234 (3.6)              | 533 (1.9)          | 448 (2.4)    | 14,393 (1.9)   | 38 (2.2)                     | <5                         | 5 (4.1)                   |
| 2010              | 205 (3.1)              | 574 (2.0)          | 490 (2.7)    | 14,675 (1.7)   | 46 (2.7)                     | <5                         | 5 (4.1)                   |
| 2011              | 206 (3.1)              | 565 (2.0)          | 481 (2.6)    | 14,947 (1.7)   | 39 (2.3)                     | <5                         | 8 (6.5)                   |
| 2012              | 229 (3.5)              | 601 (2.1)          | 529 (2.9)    | 16,088 (1.8)   | 39 (2.3)                     | <5                         | <5                        |
| 2013              | 225 (3.4)              | 616 (2.2)          | 509 (2.8)    | 17,431 (2.0)   | 59 (3.5)                     | 5 (6.7)                    | 7 (5.7)                   |
| 2014              | 193 (2.9)              | 651 (2.3)          | 561 (3.0)    | 17,124 (1.7)   | 62 (3.7)                     | <5                         | 5 (4.1)                   |
| 2015              | 211 (3.2)              | 704 (2.5)          | 583 (3.2)    | 16,993 (2.0)   | 56 (3.3)                     | <5                         | 8 (6.5)                   |
| 2016              | 202 (3.1)              | 630 (2.2)          | 574 (3.1)    | 17,540 (1.5)   | 46 (2.7)                     | 5 (6.7)                    | 7 (5.7)                   |

Abbreviations: NA, not applicable; VTE, venous thromboembolism.

**Table S6** Number (%) of deaths within 90 days following a deep venous thrombosis, pulmonary embolism, provoked VTE, unprovoked VTE, splanchnic venous thrombosis (1977–2016), cerebral venous thrombosis, and retinal venous thrombosis (1994–2016), by month of diagnosis

|                                 | Deep venous thrombosis | Pulmonary embolism | Provoked VTE | Unprovoked VTE | Splanchnic venous thrombosis | Cerebral venous thrombosis | Retinal venous thrombosis |
|---------------------------------|------------------------|--------------------|--------------|----------------|------------------------------|----------------------------|---------------------------|
| Month of diagnosis <sup>a</sup> |                        |                    |              |                |                              |                            |                           |
| January                         | 589 (9.1)              | 2,667 (9.5)        | 1,585 (8.7)  | 1,671 (10.2)   | 133 (7.9)                    | <5                         | 13 (10.3)                 |
| February                        | 599 (9.3)              | 2,662 (9.5)        | 1,657 (9.1)  | 1,605 (9.7)    | 121 (7.3)                    | 7 (10.0)                   | 14 (11.3)                 |
| March                           | 524 (8.1)              | 2,545 (9.0)        | 1,546 (8.5)  | 1,522 (9.2)    | 134 (8.0)                    | 9 (11.8)                   | 6 (4.8)                   |
| April                           | 550 (8.5)              | 2,276 (8.1)        | 1,492 (8.2)  | 1,334 (8.1)    | 138 (8.3)                    | 6 (8.1)                    | 12 (9.9)                  |
| May                             | 529 (8.2)              | 2,239 (8.0)        | 1,454 (8.0)  | 1,315 (8.0)    | 170 (10.2)                   | 6 (7.8)                    | 6 (4.8)                   |
| June                            | 529 (8.2)              | 2,243 (8.0)        | 1,499 (8.2)  | 1,273 (7.7)    | 120 (7.2)                    | 5 (6.8)                    | 12 (9.9)                  |
| July                            | 491 (7.6)              | 2,163 (7.7)        | 1,401 (7.7)  | 1,252 (7.6)    | 147 (8.8)                    | 5 (6.5)                    | 11 (8.7)                  |
| August                          | 491 (7.6)              | 2,185 (7.8)        | 1,426 (7.8)  | 1,249 (7.6)    | 148 (8.9)                    | 3 (3.9)                    | 7 (5.6)                   |
| September                       | 520 (8.0)              | 2,171 (7.7)        | 1,496 (8.2)  | 1,195 (7.3)    | 134 (8.0)                    | 6 (8.1)                    | 6 (4.9)                   |
| October                         | 513 (7.9)              | 2,237 (7.9)        | 1,480 (8.1)  | 1,271 (7.7)    | 122 (7.3)                    | 7 (9.2)                    | 10 (7.9)                  |
| November                        | 571 (8.8)              | 2,352 (8.4)        | 1,546 (8.5)  | 1,377 (8.4)    | 151 (9.0)                    | 6 (8.1)                    | 18 (14.8)                 |
| December                        | 566 (8.7)              | 2,425 (8.6)        | 1,594 (8.8)  | 1,397 (8.5)    | 151 (9.0)                    | 11 (14.4)                  | 9 (7.2)                   |

Abbreviation: VTE, venous thromboembolism.

<sup>a</sup>Cases were adjusted for the length of the month and rounded to the nearest integer.**Table S7** Peak-to-trough ratios (95% confidence intervals) of summarized monthly cases during 1977–2016 (deep venous thrombosis, pulmonary embolism, provoked VTE, unprovoked VTE, and splanchnic venous thrombosis) and during 1994–2016 (cerebral venous thrombosis and retinal venous thrombosis) using a log-linear Poisson regression model

| Deep venous thrombosis | Pulmonary embolism  | Provoked VTE        | Unprovoked VTE      | Splanchnic venous thrombosis | Cerebral venous thrombosis | Retinal venous thrombosis |
|------------------------|---------------------|---------------------|---------------------|------------------------------|----------------------------|---------------------------|
| 1.11<br>(1.09–1.13)    | 1.23<br>(1.21–1.26) | 1.17<br>(1.15–1.20) | 1.15<br>(1.14–1.17) | 1.11<br>(1.02–1.22)          | 1.23<br>(1.04–1.46)        | 1.13<br>(1.08–1.18)       |
